# Supplementary material
Source: PubMed Central journal article supplement (PMC4274803)
Supplement: supp_db14-0215_DB140215SupplementaryData.pdf [file supp_db14-0215_DB140215SupplementaryData.pdf]

SUPPLEMENTARY DATA

**Supplementary Table 1.** Univariate analysis of risk factors for Sustained Microalbuminuria (AER>30)

| Characteristics                                   | Development of sustained microalbuminuria (AER $\geq$ 30mg/24hr) from DCCT closeout through EDIC study year 15-16 |                    |         |
|---------------------------------------------------|-------------------------------------------------------------------------------------------------------------------|--------------------|---------|
|                                                   | Event                                                                                                             | Nonevent           | P value |
| <b>N</b>                                          | 38                                                                                                                | 160                |         |
| <b>Demographic</b>                                |                                                                                                                   |                    |         |
| <b>Age at EDIC study baseline</b>                 | 32.8 $\pm$ 7.6                                                                                                    | 34.4 $\pm$ 6.5     | 0.25    |
| <b>Women (%)</b>                                  | 55.3                                                                                                              | 46.9               | 0.35    |
| <b>Diabetes duration at EDIC baseline (years)</b> | 9.6 $\pm$ 3.9                                                                                                     | 10.8 $\pm$ 4.8     | 0.25    |
| <b>DCCT treatment group</b>                       |                                                                                                                   |                    |         |
| <b>Intensives (%)</b>                             | 47.4                                                                                                              | 59.4               | 0.18    |
| <b>Glycemia control</b>                           |                                                                                                                   |                    |         |
| <b>DCCT mean A1c (%)</b>                          | 8.9 $\pm$ 1.6                                                                                                     | 7.8 $\pm$ 1.5      | <.0001  |
| <b>EDIC mean A1c up to EDIC study year 16 (%)</b> | 9.0 $\pm$ 1.3                                                                                                     | 7.8 $\pm$ 1.0      | <.0001  |
| <b>Retinopathy at EDIC baseline (%)</b>           |                                                                                                                   |                    |         |
| <b>No retinopathy (10/10)</b>                     | 18.4                                                                                                              | 33.1               | 0.11    |
| <b>Microaneurismsonly20/(&lt;)20</b>              | 44.7                                                                                                              | 36.9               |         |
| <b>Mild NPDR 35/(&lt;)35</b>                      | 21.1                                                                                                              | 20.6               |         |
| <b>Moderate NPDR or worse 43/(&lt;)43 +</b>       | 15.8                                                                                                              | 9.4                |         |
| <b>Renal at EDIC baseline</b>                     |                                                                                                                   |                    |         |
| <b>AER (mg/24 hr), median (inter-quartiles)</b>   | 11.5<br>(7.2, 20.2)                                                                                               | 7.2<br>(4.3, 10.1) | <.0001  |

SUPPLEMENTARY DATA

|                                          |                |                |                  |
|------------------------------------------|----------------|----------------|------------------|
| <b>AER<math>\geq</math>40 (%)</b>        | 10.5           | 0              | <b>&lt;.0001</b> |
| <b>Neuropathy at EDIC baseline</b>       |                |                |                  |
| <b>Confirmed clinical neuropathy (%)</b> | 10.5           | 8.8            | 0.74             |
| <b>Abnormal autonomic function (%)</b>   | 18.2           | 5.2            | <b>0.012</b>     |
| <b>Skin Collagens at EDIC baseline</b>   |                |                |                  |
| <b>Furosine (pmol/mg)</b>                | 886 $\pm$ 214  | 724 $\pm$ 214  | <b>&lt;.0001</b> |
| <b>CML (pmol/mg)</b>                     | 590 $\pm$ 127  | 515 $\pm$ 128  | <b>0.001</b>     |
| <b>Pentosidine (pmol/mg)</b>             | 29.1 $\pm$ 8.4 | 24.8 $\pm$ 6.7 | <b>0.001</b>     |
| <b>Fluorescence (pmol/mg)</b>            | 197 $\pm$ 45   | 182 $\pm$ 50   | <b>0.02</b>      |
| <b>Acid-soluble collagen (%)</b>         | 0.48 $\pm$ 0.2 | 0.58 $\pm$ 0.3 | <b>0.03</b>      |
| <b>Pepsin-soluble collagen (%)</b>       | 5.7 $\pm$ 2.7  | 7.1 $\pm$ 3.3  | <b>0.003</b>     |
| <b>GSPNE (nmol/mg)</b>                   | 2.8 $\pm$ 0.6  | 2.4 $\pm$ 0.6  | <b>&lt;.0001</b> |
| <b>CEL (pmol/mg)</b>                     | 158 $\pm$ 98   | 144 $\pm$ 113  | 0.22             |
| <b>G-H1 (pmol/mg)</b>                    | 74 $\pm$ 51    | 64 $\pm$ 29    | 0.47             |
| <b>MG-H1(nmol/mg)</b>                    | 0.95 $\pm$ 0.6 | 0.77 $\pm$ 0.4 | 0.056            |

~ The nephropathy analyses excluded those who had sustained AER $\geq$ 30mg/24 hr at DCCT closeout (n=18).

SUPPLEMENTARY DATA

**Supplementary Table 2.** Summary of multivariable logistic regressions for Sustained Microalbuminuria (AER>30)

| Covariate effects from multiple models                                                                                                                                                | Df | X <sup>2</sup> | P value       | Entropy R <sup>2</sup> | OR~ (95% CI)   |
|---------------------------------------------------------------------------------------------------------------------------------------------------------------------------------------|----|----------------|---------------|------------------------|----------------|
| <b>All AGEs:<br/>Furosine,CML,pentosidine,<br/>Fluorescence, acid/pepsin soluble,CEL, GH1,<br/>MG-H1, GSPNE</b>                                                                       |    |                |               |                        |                |
| <b>Unadjusted</b>                                                                                                                                                                     | 10 | 22.6           | <b>0.012</b>  | 0.12                   |                |
| <b>Adjusted for</b>                                                                                                                                                                   |    |                |               |                        |                |
| DCCT mean A1c                                                                                                                                                                         | 10 | 13.4           | 0.20          | 0.07                   |                |
| EDIC mean A1c                                                                                                                                                                         | 10 | 20.5           | <b>0.03</b>   | 0.11                   |                |
| <b>Old AGEs published in 2005:<br/>Furosine,CML,pentosidine,<br/>Fluorescence, acid/pepsin soluble</b>                                                                                |    |                |               |                        |                |
| <b>Unadjusted</b>                                                                                                                                                                     | 6  | 20.1           | <b>0.003</b>  | 0.11                   |                |
| <b>Adjusted for</b>                                                                                                                                                                   |    |                |               |                        |                |
| DCCT mean A1c                                                                                                                                                                         | 6  | 10.6           | 0.10          | 0.06                   |                |
| EDIC mean A1c                                                                                                                                                                         | 6  | 17.4           | <b>0.008</b>  | 0.10                   |                |
| <b>Backward selected AGEs:<br/>Furosine</b>                                                                                                                                           |    |                |               |                        |                |
| <b>Unadjusted</b>                                                                                                                                                                     | 1  | 14.4           | <b>0.0002</b> | 0.08                   | 2.0 (1.4, 2.9) |
| <b>Adjusted for</b>                                                                                                                                                                   |    |                |               |                        |                |
| DCCT mean A1c                                                                                                                                                                         | 1  | 2.9            | 0.09          | 0.02                   | 1.6 (1.0, 2.5) |
| EDIC mean A1c                                                                                                                                                                         | 1  | 7.9            | <b>0.005</b>  | 0.04                   | 2.0 (1.3, 3.2) |
| CML,pentosidine, Fluorescence,<br>acid/pepsin soluble, CEL, GH1, MG-<br>H1, GSPNE                                                                                                     | 1  | 6.7            | <b>0.01</b>   | 0.04                   | 2.0 (1.0, 3.2) |
| <b>All significant factors:<br/>        DCCT mean A1c, EDIC mean A1c,<br/>        Retinopathy, log(AER), and<br/>        abnormal autonomic function at<br/>        EDIC baseline</b> | 1  | 5.2            | <b>0.02</b>   | 0.03                   | 2.5 (1.0, 6.3) |
| <b>DCCT mean A1c effect</b>                                                                                                                                                           |    |                |               |                        |                |
| <b>Unadjusted</b>                                                                                                                                                                     | 1  | 14.0           | <b>0.0002</b> | 0.07                   | 1.9 (1.4, 2.8) |
| <b>Adjusted for</b>                                                                                                                                                                   |    |                |               |                        |                |
| Furosine,CML,pentosidine,<br>Fluorescence, acid/pepsin soluble,<br>CEL, GH-1, MG-H1, GSPNE                                                                                            | 1  | 0.9            | 0.35          | 0.01                   | 1.3 (0.7, 2.4) |
| <b>Backward Selected AGEs:<br/>        Furosine</b>                                                                                                                                   | 1  | 1.2            | 0.28          | 0.01                   | 1.4 (0.8, 2.3) |

SUPPLEMENTARY DATA

| <b>EDIC mean A1c effect</b>                                                                 |   |      |                  |      |                |
|---------------------------------------------------------------------------------------------|---|------|------------------|------|----------------|
| <b>Unadjusted</b>                                                                           | 1 | 32.0 | <b>&lt;.0001</b> | 0.17 | 2.9 (1.9, 4.3) |
| <b>Adjusted for</b>                                                                         |   |      |                  |      |                |
| <b>Furosine,CML,pentosidine, Fluorescence, acid/pepsin soluble, CEL, GH-1, MG-H1, GSPNE</b> | 1 | 23.1 | <b>&lt;.0001</b> | 0.13 | 2.7 (1.7, 4.2) |
| <b>Backward Selected AGEs: Furosine</b>                                                     | 1 | 21.4 | <b>&lt;.0001</b> | 0.12 | 2.5 (1.6, 3.8) |

~ Odds ratio is based on 1 standard deviation increase in the continuous variables (DCCT mean A1c: 1.6%; EDIC mean A1c: 1.1%; furosine: 231 pmol/mg)).

SUPPLEMENTARY DATA

**Supplementary Table 3.** Spearman correlation among skin collagen modifications and with HbA1c

|                        | <b>Furosine</b>                     | <b>Fructose-lysine</b>              | <b>CML</b>                          | <b>Pentosidine</b>                  | <b>Fluorescence</b>                 | <b>Acid Soluble</b>                 | <b>Pepsin Soluble</b>               | <b>GSPNE</b> | <b>CEL</b>                          | <b>G-H1</b> | <b>MG-H1</b> | <b>DCCT mean HbA1c</b> |
|------------------------|-------------------------------------|-------------------------------------|-------------------------------------|-------------------------------------|-------------------------------------|-------------------------------------|-------------------------------------|--------------|-------------------------------------|-------------|--------------|------------------------|
| <b>Fructose-lysine</b> | <b>0.70</b><br>( <b>&lt;.001</b> )  |                                     |                                     |                                     |                                     |                                     |                                     |              |                                     |             |              |                        |
| <b>CML</b>             | <b>0.40</b><br>( <b>&lt;.001</b> )  | <b>0.36</b><br>( <b>&lt;.001</b> )  |                                     |                                     |                                     |                                     |                                     |              |                                     |             |              |                        |
| <b>Pentosidine</b>     | <b>0.42</b><br>( <b>&lt;.001</b> )  | <b>0.37</b><br>( <b>&lt;.001</b> )  | <b>0.62</b><br>( <b>&lt;.001</b> )  |                                     |                                     |                                     |                                     |              |                                     |             |              |                        |
| <b>Fluorescence</b>    | <b>0.38</b><br>( <b>&lt;.001</b> )  | <b>0.29</b><br>( <b>&lt;.001</b> )  | <b>0.44</b><br>( <b>&lt;.001</b> )  | <b>0.48</b><br>( <b>&lt;.001</b> )  |                                     |                                     |                                     |              |                                     |             |              |                        |
| <b>Acid Soluble</b>    | <b>-0.26</b><br>( <b>&lt;.001</b> ) | <b>-0.22</b><br>( <b>0.001</b> )    | <b>-0.34</b><br>( <b>&lt;.001</b> ) | <b>-0.34</b><br>( <b>&lt;.001</b> ) | <b>-0.21</b><br>( <b>0.002</b> )    |                                     |                                     |              |                                     |             |              |                        |
| <b>Pepsin Soluble</b>  | <b>-0.51</b><br>( <b>&lt;.001</b> ) | <b>-0.45</b><br>( <b>&lt;.001</b> ) | <b>-0.56</b><br>( <b>&lt;.001</b> ) | <b>-0.62</b><br>( <b>&lt;.001</b> ) | <b>-0.37</b><br>( <b>&lt;.001</b> ) | <b>0.69</b><br>( <b>&lt;.001</b> )  |                                     |              |                                     |             |              |                        |
| <b>GSPNE</b>           | <b>0.52</b><br>( <b>&lt;.001</b> )  | <b>0.56</b><br>( <b>&lt;.001</b> )  | <b>0.50</b><br>( <b>&lt;.001</b> )  | <b>0.57</b><br>( <b>&lt;.001</b> )  | <b>0.43</b><br>( <b>&lt;.001</b> )  | <b>-0.38</b><br>( <b>&lt;.001</b> ) | <b>-0.53</b><br>( <b>&lt;.001</b> ) |              |                                     |             |              |                        |
| <b>CEL</b>             | -0.06<br>(NS)                       | 0.12<br>(NS)                        | 0.02<br>(NS)                        | -0.04<br>(NS)                       | -0.07<br>(NS)                       | -0.02<br>(NS)                       | 0.03<br>(NS)                        | 0.11<br>(NS) |                                     |             |              |                        |
| <b>G-H1</b>            | 0.07<br>(NS)                        | -0.01<br>(NS)                       | 0.10<br>(NS)                        | <b>0.19</b><br>( <b>0.005</b> )     | <b>0.24</b><br>( <b>&lt;.001</b> )  | 0.04<br>(NS)                        | -0.05<br>(NS)                       | 0.08<br>(NS) | <b>-0.57</b><br>( <b>&lt;.001</b> ) |             |              |                        |

SUPPLEMENTARY DATA

|                            |                                    |                                    |                                    |                                    |                                    |                                     |                                     |                                    |                                    |                                    |              |                                    |
|----------------------------|------------------------------------|------------------------------------|------------------------------------|------------------------------------|------------------------------------|-------------------------------------|-------------------------------------|------------------------------------|------------------------------------|------------------------------------|--------------|------------------------------------|
| <b>MG-H1</b>               | 0.13<br>(NS)                       | <b>0.26</b><br>( <b>&lt;.001</b> ) | <b>0.34</b><br>( <b>&lt;.001</b> ) | <b>0.42</b><br>( <b>&lt;.001</b> ) | <b>0.17</b><br>( <b>0.01</b> )     | <b>-0.17</b><br>( <b>0.01</b> )     | <b>-0.30</b><br>( <b>&lt;.001</b> ) | <b>0.41</b><br>( <b>&lt;.001</b> ) | <b>0.40</b><br>( <b>&lt;.001</b> ) | <b>0.29</b><br>( <b>&lt;.001</b> ) |              |                                    |
| <b>DCCT mean<br/>HbA1c</b> | <b>0.72</b><br>( <b>&lt;.001</b> ) | <b>0.63</b><br>( <b>&lt;.001</b> ) | <b>0.38</b><br>( <b>&lt;.001</b> ) | <b>0.37</b><br>( <b>&lt;.001</b> ) | <b>0.37</b><br>( <b>&lt;.001</b> ) | <b>-0.26</b><br>( <b>&lt;.001</b> ) | <b>-0.47</b><br>( <b>&lt;.001</b> ) | <b>0.48</b><br>( <b>&lt;.001</b> ) | -0.03<br>(NS)                      | 0.09<br>(NS)                       | 0.11<br>(NS) |                                    |
| <b>EDIC mean<br/>HbA1c</b> | <b>0.29</b><br>( <b>&lt;.001</b> ) | <b>0.27</b><br>( <b>&lt;.001</b> ) | 0.07<br>(NS)                       | 0.02<br>(NS)                       | 0.07<br>(NS)                       | -0.09<br>(NS)                       | <b>-0.15</b><br>( <b>0.02</b> )     | <b>0.21</b><br>( <b>0.002</b> )    | -0.02<br>(NS)                      | 0.05<br>(NS)                       | 0.04<br>(NS) | <b>0.40</b><br>( <b>&lt;.001</b> ) |
